# Supplementary material for: Investigating Lab-scaled Offshore Wind Aerodynamic Testing Failure and Developing Solutions for Early Anomaly Detections
Source: Copernicus journal article supplement (doi:10.5194/wes-2025-31), 2025-03-14
Supplement: Supplementary file [file wes-2025-31-AC1-supplement.pdf]

We sincerely thank both reviewers for their thoughtful and constructive feedback. In response to their comments, we have made several substantial revisions aimed at improving the overall structure, clarity, and readability of the manuscript. The key modifications are summarized as follows:

- A new section titled “Problem Statement” has been introduced between the Methodology and Results sections. This section provides a clearer narrative by outlining the available experimental dataset, describing the general hyperparameter setup of the models, and presenting the rationale behind the selected anomaly detection criteria and their variations.
- The previously included subsection on “variation of anomaly detection criteria combination to the accuracy of the models” has been removed. The relevant results and insights are now integrated directly into the revised Results and Discussion sections for improved coherence.
- Tables 1 and 2 from the earlier manuscript have been consolidated and replaced with a single, more comprehensive table. This new table summarizes all models evaluated across different datasets and experimental conditions and is discussed in depth in the updated Discussion section.
- The sensitivity study subsection has been removed as a standalone section and its contents have been redistributed across relevant parts of the Results and Discussion sections.
- A new Results subsection has been added to present model performance under a series of synthetically introduced anomalies. This addition supports a broader evaluation of model generalization and robustness across different fault scenarios.

---

*RC1*

---

## 1. Language and Grammar:

- **Par 25:** Some sentences contain grammatical errors and awkward phrasing, making it challenging to understand the intended meaning. For instance, the use of the term "acute care" in a technical context is not entirely appropriate. I suggest replacing it with more suitable phrases such as "careful handling" or "close attention," depending on the tone you want.

A) Thank you. The language is enhanced throughout the manuscript. Next is a screenshot of the delta file – explaining changes between first and second submission – with the specific change highlighted as requested).

To meet this demand, lab-scale turbine systems are designed to match the performance of full-scale offshore commercial wind plants ~~to facilitate accurate coupling of wind turbine dynamics with~~, enabling accurate coupling between wind turbine aerodynamics and the hydrodynamic forces on the substructure Fowler et al. (2023); Kim (2014); Cao et al. (2023). ~~As a consequence of the low Reynolds wind environment at lab scale, model turbine blades rely on~~ Due to the low Reynolds number at lab scale, thin airfoil sections are used for the model turbine blades, such as the SD7032, to achieve ~~sealed rotor performance, increasing flexibility and reducing strength of the blades. Furthermore, due to tight mass considerations, particularly for floating models, system redundancy in the case of full scale rotor performance. However, this increases blade flexibility and reduces structural strength. Additionally, because of strict mass constraints particularly for floating configurations system redundancy that accommodate~~ equipment malfunctions is ~~not generally designed for Parker (2022). Consequently~~ typically not included in the design (Parker, 2022). As a result, lab-scale turbines are highly sensitive ~~pieces of equipment requiring acute care systems that require careful handling by~~ operators to ensure safe and reliable operation throughout a test campaign.

**-There are a few instances where the text contains repetitive expressions, such as "as a consequence..." and "consequently," within the same paragraph. Reducing repetition will help enhance readability.**

A) We thank the reviewer for their comment. Here's an updated version:

In experimental testing campaigns, ~~and~~ particularly when testing novel control algorithms, the likelihood of fault events ~~is increased and the consequences of a fault or erroneous command increases, and their impacts~~ can be severe. These ~~events could fold as consequences of an operator error, erroneous faults may arise from operator errors, incorrect~~ control commands, or instrumentation malfunctions (Peng et al., 2023). Such ~~errors can lead to costly damage to lab equipment incidents can result in costly equipment damage,~~ violations of laboratory safety standards, and ~~cause significant project delays; therefore~~ substantial project delays. Therefore, efforts to develop efficient methods of detecting operational faults are critical to improving the testing process ~~-(Leahy et al., 2016; Lu et al., 2024).~~

**- Par 25. There are sentences that need to be fixed, for example, the sentence starting with "Furthermore" should read "Furthermore, due to tight mass considerations, particularly for floating models, system redundancy in the case of equipment malfunctions is generally not implemented, as noted by Parker (2022)."**

A) The overall language is improved as follows:

To meet this demand, lab-scale turbine systems are designed to match the performance of full-scale offshore commercial wind plants ~~to facilitate accurate coupling of wind turbine dynamics with~~, enabling accurate coupling between wind turbine aerodynamics and the hydrodynamic forces on the substructure Fowler et al. (2023); Kim (2014); Cao et al. (2023). ~~As a consequence of the low Reynolds wind environment at lab scale, model turbine blades rely on~~ Due to the low Reynolds number at lab scale, thin airfoil sections are used for the model turbine blades, such as the SD7032, to achieve ~~sealed rotor performance, increasing flexibility and reducing strength of the blades. Furthermore, due to tight mass considerations, particularly for floating models, system redundancy in the case of~~ full scale rotor performance. However, this increases blade flexibility and reduces structural strength. Additionally, because of strict mass constraints ~~particularly for floating configurations~~ system redundancy that accommodate equipment malfunctions is ~~not generally designed for~~ Parker (2022). ~~Consequently~~ typically not included in the design (Parker, 2022). As a result, lab-scale turbines are highly sensitive ~~pieces of equipment requiring acute care~~ systems that require careful handling by operators to ensure safe and reliable operation throughout a test campaign.

- Par 150 is really difficult to understand (Especially the sentence starting with "The combinations.."). Both in terms of English and some parameters, such as  $DE|E$  and  $DE\&E$  conditions, are not clearly explained.

A) This is now further enhanced under the "Problem statement" section:

~~The model used to detect an anomaly is based on a double condition criteria;~~ Three combinations of anomaly detection criteria were investigated. The symbols  $E$  and  $\Delta E$  refer to threshold-exceeding conditions based on the model prediction error and its time derivative, respectively. The detection logic tested includes:

1.  $\Delta E$  - the derivative of the error must exceed a threshold;
2.  $\Delta E \vee E$  - either the error or its derivative must exceed its threshold.
3.  $\Delta E \wedge E$  - both the error and its derivative must ~~exceed the training error thresholds. This was shown to provide the most accurate model (from a sensitivity study carried out and presented below). The trained model tested against the run~~

210 ~~where the anomaly took place. The evolution of the error derivative of the first component for~~ simultaneously exceed their respective thresholds; and

We've added the:  $\vee$  and  $\wedge$  symbols to describe logical (or) and logical (and) mathematically.

- Par 160: FOR is written in capital. The sentence "As is...." Should be rewritten.

A) This paragraph has been omitted.

- Par 165: No verb in the first sentence.

A) This paragraph has been omitted.

- Par 190: Sentence "This work ...." should be rewritten.

A) We thank the reviewer. The paragraph is rephrased as such:

355 ~~This work serves as a proof of concept that such easy-to-establish simple, interpretable, and computationally efficient techniques can be used as a safety precaution during future campaign testings to reduce human error and equipment malfunction in the laboratory, in particular when innovative technologies and control strategies are being tested~~ deployed to enhance safety and operational awareness during laboratory-scale wind turbine testing. The approach holds promise for extension to ocean-based and full-scale wind energy systems, where early anomaly detection is critical for preventing equipment failure and improving system reliability during experimental campaigns and operational phases.

## 2. Clarity and Technical Accuracy:

**- Par 35: In some sections, the explanation of velocity measurement as a vibration-based monitoring technique is not entirely clear. A more detailed rationale or supporting reference would improve comprehension.**

**A)** We have clarified the explanation of vibration-based monitoring techniques, particularly the use of velocity measurements, by referencing ISO 10816-21, which recommends evaluating vibration amplitudes using the root mean square (RMS) of velocity or acceleration signals. The paragraph has been revised accordingly for improved clarity, and additional supporting references have been incorporated to strengthen the discussion:

~~Currently, studies of conceptual vibration-based~~ Vibration-based condition monitoring techniques, ~~such as velocity and acceleration measurements, were proposed for rapid and early online fault detection~~ often evaluated using the root mean square (RMS) of velocity or acceleration signals, are widely used for drivetrain fault detection, particularly to determine whether signal amplitudes exceed the thresholds defined by standards such as ISO 10816-21 (ISO, 1996). For example, Nejad et al. (2018) demonstrated that angular velocity measurements already available in existing control systems can be repurposed for fault detection, avoiding the need for costly additional instrumentation. Their approach was motivated by the challenge of identifying faults in ~~commercial-scale systems (Nejad et al., 2018); however, in~~ complex systems composed of multiple with many interconnected components, where vibration signals may originate from multiple sources and the data captured by individual sensors may offer limited insight. Consequently various internal sources at different frequencies. In such cases, incorporating multiple data channels is essential for constructing a comprehensive representation sensor channels is often necessary to obtain a more complete understanding of system behavior, though doing so can come at the expense of greater. However, this added complexity can increase computational cost and the risk of misinterpreting otherwise irrelevant signal data. Such risks can be mitigated through dimension reduction strategies during system irrelevant or noisy signal components.

**- Par 95: What does rotating a matrix mean? Do you mean transposing it? Needs to be clarified.**

**A)** This section is revised and further explained as follows:

Data are then standardized to ensure all channels (features) are on the same scale to prevent features with larger ranges dominate. The covariance matrix is then computed for the standardized variables, which is then rotated to become a diagonal matrix, with transformed variable, a.k.a. have a mean value,  $\mu$ , of 0 and a standard deviation,  $\sigma$ , of 1:

$$x_i = \frac{x_i - \mu_i}{\sigma_i}, i = 1, \dots, N, \quad (1)$$

where  $N$  is the number of channels included in the model. Following standardization, the covariance matrix of the variables was computed and then diagonalized through eigendecomposition, yielding a set of orthogonal transformed variables—i.e., the principal components (PCs), ranked from those describing the largest to the lowest fraction of the total variance. One can finally decide which components to retain for the purpose of reducing the problem dimensionality, which still explaining the largest possible amount of—ordered by the amount of total variance they explain. Based on this ranked structure, a subset of components can be selected to reduce the dimensionality of the problem while preserving as much of the original variance as possible. For instance, the first 5 PCs and channel loads/contributions to them is illustrated in Fig. 4b

- Par 130: Information given here is mentioned earlier and is repeated here. This reduces the rigor, conciseness, and precision of the entire text.

A) Rephrased

#### 235 4.3 Pre-strike anomaly detection

During a high rotor angular velocity test,  $\mathcal{D}_3$ , an unexpected anomaly caused the rotor to accelerate rapidly. The resulting increase in thrust forces caused significant blade deflection, and within four seconds, one of the blades struck the tower, leading to severe damage, as shown in Figure 13.

- Tables 1 and 2 have a central importance to the paper. But they are not adequately explained or referenced in the text. They should be explained and discussed thoroughly. Providing more context, especially when discussing essential results or comparisons, would enhance the reader's understanding.

A) Agreed. First, a new table describing dataset usage for the models is discussed in Problem statement:

**Table 1.** Dataset usage by models  $\mathcal{M}_1$  and  $\mathcal{M}_3$  for different tasks. Time intervals are in seconds.

| Model           | Task            | Dataset(s)                                                 | Interval                            |
|-----------------|-----------------|------------------------------------------------------------|-------------------------------------|
| $\mathcal{M}_1$ | Training        | $\mathcal{D}_1$                                            | [100, 450]                          |
|                 | Validation      | $\mathcal{D}_1$                                            | (450, 675]                          |
|                 | Error threshold | $\mathcal{D}_1$                                            | [100, 1000]                         |
|                 | Testing         | $\mathcal{D}_2, \mathcal{D}_2^{(a1,a2,a3)}, \mathcal{D}_3$ | [100, 1000], [100, 350], (135, 190] |
| $\mathcal{M}_3$ | Training        | $\mathcal{D}_3$                                            | [70, 119]                           |
|                 | Validation      | $\mathcal{D}_3$                                            | (119, 135]                          |
|                 | Error threshold | $\mathcal{D}_3$                                            | [70, 135]                           |
|                 | Testing         | $\mathcal{D}_3$                                            | (135, 190]                          |

This is important to help the reader understand the differences between the datasets used in the paper. Table 1 is further explained in the text in the problem statement section:

Three datasets,  $\mathcal{D}_1, \mathcal{D}_2, \mathcal{D}_3$ , were gathered during the test campaign. While wind speeds were kept constant (variation  $< 1\%$ ), the rotor angular velocity for  $\mathcal{D}_2$  dataset was slightly lower by 12% and higher by 51% for  $\mathcal{D}_3$ , relative to  $\mathcal{D}_1$ . The angular velocity, and the resulting thrust force variations are illustrated in Fig. 9a and Fig. 9b, respectively. The blade pitch varied the same way for these cases based on the pre-generated setpoints. The actual anomaly and blade strike occurred near the end of  $\mathcal{D}_3$ , which was truncated to  $< 200$  s, while  $\mathcal{D}_1$  and  $\mathcal{D}_2$  each span 1000 s. In addition, three altered variants of  $\mathcal{D}_2$  were generated to introduce a synthetic anomaly for further evaluation of the developed models:  $\mathcal{D}_2^{(a1)}, \mathcal{D}_2^{(a2)}$ , and  $\mathcal{D}_2^{(a3)}$ . The synthetic anomaly was imposed by modifying the tower base fore-aft bending moment,  $M_y$ , through a time-varying amplification factor. This factor was applied starting from an arbitrary onset time (225 s), increased linearly to a maximum value by 250 s, and then reduced back to unity by 275 s. The variants amplify the signal by 0.25%, 0.5%, and 1.00% per  $\Delta t$  for  $\mathcal{D}_2^{(a1)}, \mathcal{D}_2^{(a2)}$ , and  $\mathcal{D}_2^{(a3)}$ , respectively. Table 1 summarizes the model setup and intervals of datasets utilized during training, validation, anomaly criteria threshold selection, and testing tasks.

After we performed all the analysis, we summarized it all in Table 2:



**Table 2.** Anomaly detection performance for models tested on datasets  $\mathcal{D}_2$ ,  $\mathcal{D}_2^{(a1)}$ ,  $\mathcal{D}_2^{(a2)}$ ,  $\mathcal{D}_2^{(a3)}$ , and  $\mathcal{D}_3$ , under different detection criteria:  $\Delta E$ ,  $\Delta E \vee E$ , and  $\Delta E \wedge E$ .

| Criterion           | Dataset                | IPC   |       |       |       |      |      |      | MPC   |       |       |       |      |      |      |
|---------------------|------------------------|-------|-------|-------|-------|------|------|------|-------|-------|-------|-------|------|------|------|
|                     |                        | $T^+$ | $F^-$ | $F^+$ | $T^-$ | $P$  | $R$  | $FI$ | $T^+$ | $F^-$ | $F^+$ | $T^-$ | $P$  | $R$  | $FI$ |
| $\Delta E$          | $\mathcal{D}_2$        | 0     | 0     | 0     | 1800  | N/A  | N/A  | N/A  | 0     | 0     | 0     | 1800  | N/A  | N/A  | N/A  |
|                     | $\mathcal{D}_2^{(a1)}$ | 75    | 26    | 30    | 369   | 0.74 | 0.71 | 0.73 | 18    | 36    | 17    | 382   | 0.82 | 0.18 | 0.29 |
|                     | $\mathcal{D}_2^{(a2)}$ | 92    | 9     | 36    | 363   | 0.91 | 0.72 | 0.80 | 70    | 31    | 18    | 381   | 0.80 | 0.69 | 0.74 |
|                     | $\mathcal{D}_2^{(a3)}$ | 95    | 6     | 38    | 361   | 0.94 | 0.71 | 0.81 | 88    | 13    | 32    | 367   | 0.73 | 0.87 | 0.80 |
|                     | $\mathcal{D}_3$        | 49    | 2     | 4     | 125   | 0.96 | 0.93 | 0.94 | 30    | 21    | 0     | 129   | 1.00 | 0.59 | 0.74 |
| $\Delta E \vee E$   | $\mathcal{D}_2$        | 0     | 0     | 0     | 1800  | N/A  | N/A  | N/A  | 0     | 0     | 0     | 1800  | N/A  | N/A  | N/A  |
|                     | $\mathcal{D}_2^{(a1)}$ | 90    | 11    | 30    | 369   | 0.89 | 0.75 | 0.81 | 64    | 37    | 8     | 391   | 0.89 | 0.63 | 0.74 |
|                     | $\mathcal{D}_2^{(a2)}$ | 95    | 6     | 36    | 363   | 0.94 | 0.73 | 0.82 | 81    | 20    | 18    | 381   | 0.82 | 0.80 | 0.81 |
|                     | $\mathcal{D}_2^{(a3)}$ | 97    | 4     | 38    | 361   | 0.96 | 0.72 | 0.82 | 90    | 11    | 32    | 367   | 0.74 | 0.89 | 0.81 |
|                     | $\mathcal{D}_3$        | 51    | 0     | 129   | 0     | 1.00 | 0.28 | 0.44 | 51    | 0     | 121   | 8     | 0.30 | 1.00 | 0.46 |
| $\Delta E \wedge E$ | $\mathcal{D}_2$        | 0     | 0     | 0     | 1800  | N/A  | N/A  | N/A  | 0     | 0     | 0     | 1800  | N/A  | N/A  | N/A  |
|                     | $\mathcal{D}_2^{(a1)}$ | 65    | 36    | 21    | 378   | 0.64 | 0.76 | 0.70 | 18    | 83    | 1     | 398   | 0.95 | 0.18 | 0.30 |
|                     | $\mathcal{D}_2^{(a2)}$ | 87    | 17    | 28    | 371   | 0.83 | 0.75 | 0.79 | 65    | 36    | 17    | 382   | 0.79 | 0.64 | 0.71 |
|                     | $\mathcal{D}_2^{(a3)}$ | 89    | 12    | 32    | 367   | 0.88 | 0.74 | 0.80 | 81    | 20    | 25    | 374   | 0.76 | 0.80 | 0.78 |
|                     | $\mathcal{D}_3$        | 49    | 2     | 4     | 125   | 0.96 | 0.93 | 0.94 | 30    | 21    | 0     | 129   | 1.00 | 0.59 | 0.74 |

We explained the main findings thoroughly in the discussion session.

## 5 Discussion

Three combinations of anomaly detection criteria and their effects on the  $FI$  score were investigated. Table ?? and Table ?? provide a descript of these variations for the IPC and MPC models, respectively. Table 2 summarizes the anomaly detection performance of model  $\mathcal{M}_1$  with its IPC and MPC variations, evaluated on the healthy dataset  $\mathcal{D}_2$ , synthetically altered anomaly datasets  $\{\mathcal{D}_2^{(a1)}, \mathcal{D}_2^{(a2)}, \mathcal{D}_2^{(a3)}\}$ , and the  $E$  and  $\Delta E$  symbols refer to the error and the error-derivative-threshold-exceeding criteria, respectively tested under normal healthy run operations (HR) or anomaly runs (AR). The combinations studied were 1) sole derivative, 2) a combination of absolute error value and its derivative must be met, and 3) blade-tower strike dataset  $\mathcal{D}_3$ . From these results, the following key observations can be made:

- The IPC variation generally yields higher F1-scores compared to the MPC variation (43% enhancement under  $\Delta E \wedge E$  criterion);
- The combined threshold criterion  $\Delta E \wedge E$  provides the most consistent and reliable detection performance across datasets;
- While the IPC model achieves higher recall ( $R$ ), the MPC model tends to produce higher precision ( $P$ ).

Importantly, both model variations produce no false positive detections under healthy conditions ( $\mathcal{D}_2$ ), regardless of the threshold criterion employed. The IPC model typically reacts more rapidly to actual anomalies, as it is not constrained by the

Additionally, we added a new figure that compares anomaly/non-anomaly events and the ability of the models to predict those events for all datasets tested and various anomaly conditions criteria:

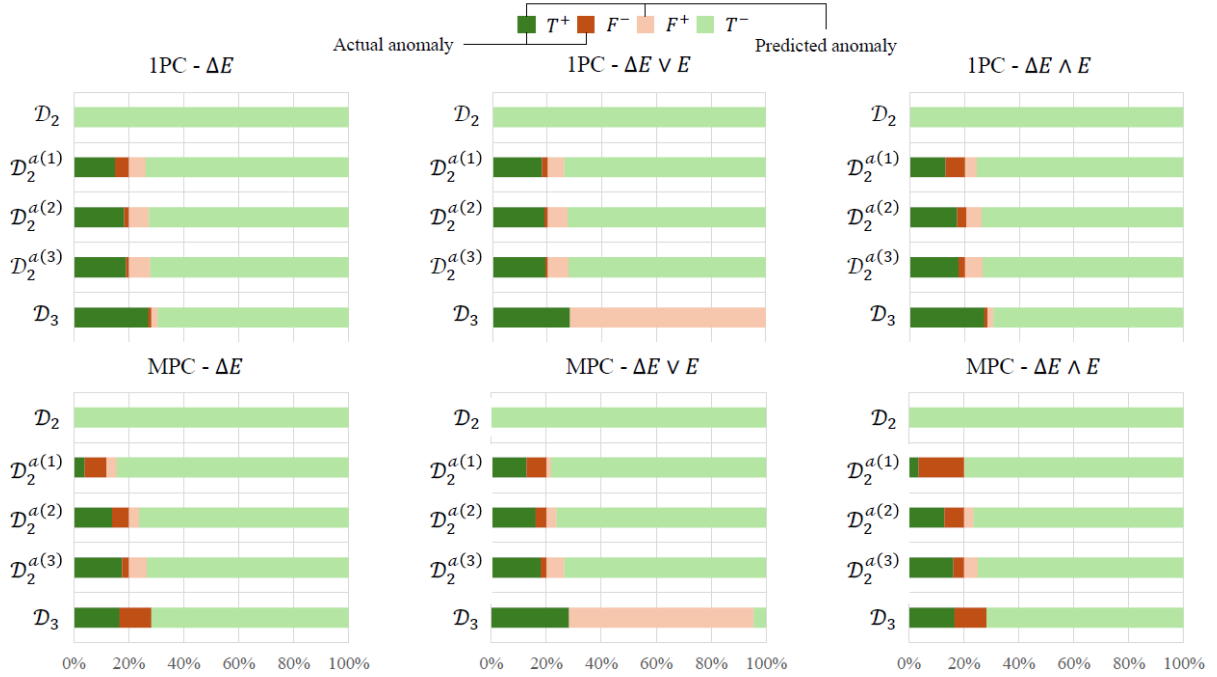

**Figure 15.** Percentage of true positives, false negatives, false positive, and true negatives occurrence when testing  $\mathcal{M}_1$  model for the various testing datasets.

- Uncertainty estimates for the P, R, and FI in Tables 1 and 2 would definitely help the technical rigor of the paper. For example, those parameters are given with 3 decimal resolution. Can this be justified?

A) Uncertainty quantification was considered out of scope for this publication but an interesting point for future research discussion. There is no justification to the choice of decimals resolution selected (2 decimal resolution in the new manuscript).

- Par 170: Increased frequency would help to make a faster detection, not reduced.

A) Correct. This is now reflected in Figure 12.



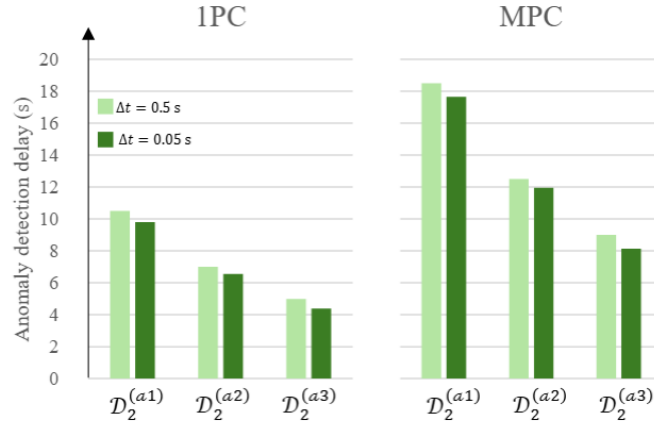

**Figure 12.** Anomaly detection delay in seconds for  $\mathcal{M}_1$  (both 1PC and MPC variations) when tested during various altered  $\mathcal{D}_2$  datasets for two timestep realizations.

### 3. Structural and Visual Presentation:

-The arrangement of the three graphs in Figure 9 can fit in a single line, which would help in better page management and improve readability.

A) That figure has been removed and replaced with a simple version in Figure 12.

### 4. Additional Considerations:

- It would be valuable to discuss the physical or mathematical reasons behind why the 1PC model performed better in anomaly detection.

A) This is now further discussed in the discussion section. The newly introduced analysis (section 4.2 in the new manuscript) helped generalize the conclusion we reached. Also the discussion has shifted from saying 1PC is always performing better in anomaly detection into more detailed difference between the two variations. Namely, 1PC has higher recall, and therefore, earlier anomaly detection but that can lead to over-detection. MPC, on the other hand, is more conservative approach and has less recall but has higher precision. This, however, can lead to more delay in the anomaly recall and some detection latency. Therefore, each has advantages and disadvantages.

**1) Details and example of data-preprocessing with time-series signals, idle sensors and exact data cleaning method used for at least one representative case. What channels are used and why were they picked.**

**A)** Section 2.4 in the new manuscript provides a description of the numerous measurements and data channels used in the analysis presented in the paper as well as some data pre-processing that took place. For instance, we explained the standardization method for scaling, provide correlation matrix between channels of interest, and covariance loadings matrix after performing PCA: This is a screenshot of the delta file (difference between old and new manuscript):

## 2.4 Anomaly detection over the span of multiple channels

In complex systems such as offshore wind testing, there are numerous measurements and data channels, which can be used to understand the overall behavior of the system. However, for anomaly detection purposes, it can be overwhelming and computationally expensive to manually and in real-time search the data space for deviation in measured data. The operator might not have sufficient time to abort the test before the anomaly becomes too consequential. Additionally, an anomaly might not be detectable based on any single data channel to comprehend the full state of the system. Therefore, the predictive model must be based on multiple data channels related to the test being conducted while providing the operator with a single, concise, anomaly detection capability based on the most relevant information. To accomplish that, principal component analysis (PCA) was carried out. A PCA creates combinations of variables that explain the largest amount of variance in the data.

~~Prior to performing this analysis, earlier data reported~~ Before performing the analysis, the raw data recorded by the data acquisition system ~~is cleaned~~ were pre-processed to remove idle measurements ~~or and~~ non-numeric values. Then, the data ~~are prepared for the PCA, by standardizing them, using their mean and standard deviation, which ensures that entries~~ Data channels collected comprises wind speed, angular velocity of the rotor, azimuth angle, all blades pitch angles, generator torque, rotor torque, forces and moments at the base of the tower. We assume the digital twin only has access to some of these channels (i.e., angular velocity,  $\dot{\theta}$ , rotor torque,  $Q$ , and tower base forces and moments:  $F_x, F_y, F_z, M_x, M_y, M_z$ ) to simulate cases where some measurements can be restricted by turbine manufacturers and validate the model's operability under restrictive data access. Figure 4a illustrates the correlation matrix between the channels of interest.

Data are then standardized to ensure all channels (features) ~~are on the same scale to prevent features with larger ranges dominate~~. The covariance matrix is then computed for the standardized variables, which is then rotated to become a diagonal matrix, with transformed variable, a.k.a. have a mean value,  $\mu$ , of 0 and a standard deviation,  $\sigma$ , of 1:

$$x_i = \frac{x_i - \mu_i}{\sigma_i}, i = 1, \dots, N, \quad (1)$$

where  $N$  is the number of channels included in the model. Following standardization, the covariance matrix of the variables was computed and then diagonalized through eigendecomposition, yielding a set of orthogonal transformed variables—i.e., the principal components (PCs), ranked from those describing the largest to the lowest fraction of the total variance. One can finally decide which components to retain for the purpose of reducing the problem dimensionality, which still explaining the largest possible amount of—ordered by the amount of total variance—they explain. Based on this ranked structure, a subset of components can be selected to reduce the dimensionality of the problem while preserving as much of the original variance as possible. For instance, the first 5 PCs and channel loads/contributions to them is illustrated in Fig. 4b.

The PCs, which are expressed as weighted sums of the earlier variables, were then used to train the RNN model(s) that will later be used for prediction. As new data is acquired, it is ~~transformed~~ transformed/projected onto the same PCs that were used in training the models. For the purpose of anomaly detection, the mean absolute error (MAE) is computed between measurements and predictions from the RNN models, and the error derivative is calculated, to estimate rapid fluctuations in the quality of

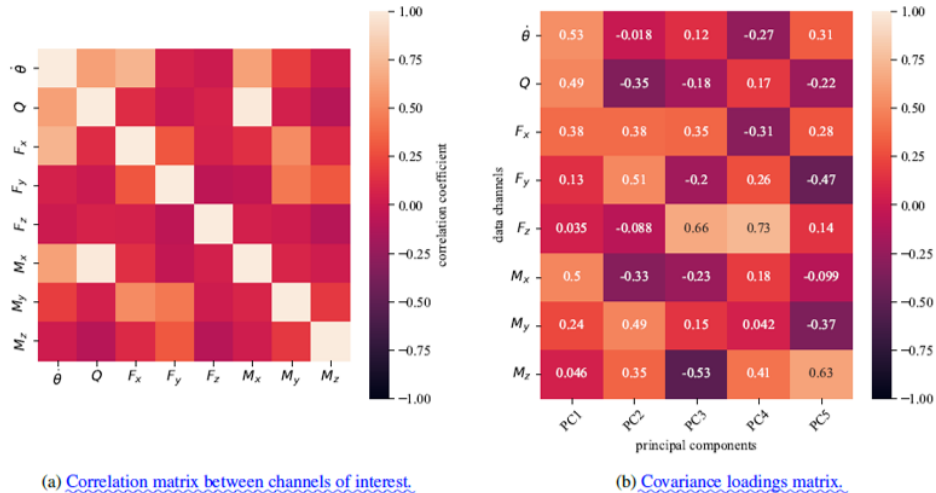

Figure 4. Data pre-processing: (a) correlation matrix between available channels used in the models, and (b) covariance loadings of the first 5 principal components.

We also provided full description of the pre-processing analysis used to determine threshold values for multiple principal component model (Figure 8 in the new manuscript). Additionally, in the new problem statement section, we explained in high detail the various dataset (cases) used in the analysis along with a description of the channels used in building the models and two plots that show time series variations in signals from datasets used in training/testing:

Three datasets,  $\mathcal{D}_1$ ,  $\mathcal{D}_2$ ,  $\mathcal{D}_3$ , were gathered during the test campaign. While wind speeds were kept constant (variation  $< 1\%$ ), the rotor angular velocity for  $\mathcal{D}_2$  dataset was slightly lower by 12% and higher by 51% for  $\mathcal{D}_3$ , relative to  $\mathcal{D}_1$ . The angular velocity, and the resulting thrust force variations are illustrated in Fig. 9a and Fig. 9b, respectively. The blade pitch varied the same way for these cases based on the pre-generated setpoints. The actual anomaly and blade strike occurred near the end of  $\mathcal{D}_3$ , which was truncated to  $< 200$  s, while  $\mathcal{D}_1$  and  $\mathcal{D}_2$  each span 1000 s. In addition, three altered variants of  $\mathcal{D}_2$  were generated to introduce a synthetic anomaly for further evaluation of the developed models:  $\mathcal{D}_2^{(a1)}$ ,  $\mathcal{D}_2^{(a2)}$ , and  $\mathcal{D}_2^{(a3)}$ . The synthetic anomaly was imposed by modifying the tower base fore-aft bending moment,  $M_y$ , through a time-varying amplification factor. This factor was applied starting from an arbitrary onset time (225 s), increased linearly to a maximum value by 250 s, and then reduced back to unity by 275 s. The variants amplify the signal by 0.25%, 0.5%, and 1.00% per  $\Delta t$  for  $\mathcal{D}_2^{(a1)}$ ,  $\mathcal{D}_2^{(a2)}$ , and  $\mathcal{D}_2^{(a3)}$  respectively. Table 1 summarizes the model setup and intervals of datasets utilized during training, validation, anomaly criteria threshold selection, and testing tasks.

During one of the high-wind-speed-tests for the aerodynamic characterization of a 1:50 scaled wind turbine, an erroneous activation of the emergency-stop led to the shutdown of the generator. This caused the rotor to spin rapidly increasing thrust forces on the blades, causing them to bend more. Within less than four seconds, one of the blades struck the tower, resulting in severe damage as shown in figure 13. Channels used in training the models include angular velocity, rotor torque, and tower base forces and moments. For most of the analyses presented in this paper, model  $\mathcal{M}_1$  was employed. This model is trained on a previously available healthy dataset,  $\mathcal{D}_1$ , and serves as the primary reference. The rationale for this approach is based on the practical constraint that datasets containing anomalies rarely have a corresponding healthy segment recorded immediately beforehand. As such, training a model in real-time using only the healthy portion of a dataset that later exhibits an anomaly is typically infeasible. Nonetheless, for comparative purposes, we also evaluate model  $\mathcal{M}_3$ , which is trained on the healthy portion of dataset  $\mathcal{D}_3$ , under the hypothetical assumption that similar data had been recorded under identical conditions in advance.

**Table 1.** Dataset usage by models  $\mathcal{M}_1$  and  $\mathcal{M}_3$  for different tasks. Time intervals are in seconds.

| Model           | Task            | Dataset(s)                                                 | Interval                            |
|-----------------|-----------------|------------------------------------------------------------|-------------------------------------|
| $\mathcal{M}_1$ | Training        | $\mathcal{D}_1$                                            | [100, 450]                          |
|                 | Validation      | $\mathcal{D}_1$                                            | (450, 675]                          |
|                 | Error threshold | $\mathcal{D}_1$                                            | [100, 1000]                         |
|                 | Testing         | $\mathcal{D}_2, \mathcal{D}_2^{(a1,a2,a3)}, \mathcal{D}_3$ | [100, 1000], [100, 350], (135, 190] |
| $\mathcal{M}_3$ | Training        | $\mathcal{D}_3$                                            | [70, 119]                           |
|                 | Validation      | $\mathcal{D}_3$                                            | (119, 135]                          |
|                 | Error threshold | $\mathcal{D}_3$                                            | [70, 135]                           |
|                 | Testing         | $\mathcal{D}_3$                                            | (135, 190]                          |

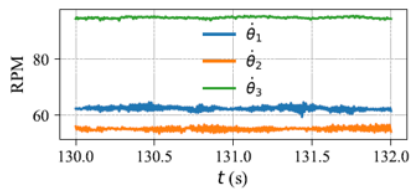

(a) Angular velocity of three experimental dataset.

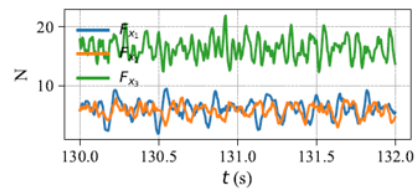

(b) Thrust force measurements of three experimental dataset.

**Figure 9.** Three experimental datasets and their variations in (a) angular velocities and (b) thrust forces.

## 2) Training - testing methodology: Type and size of RNN model used, time / resources needed for training.

A) Section 3 in the new manuscript also provides full description now of the training/validation/testing methodology and the type, size, and hyperparameters of the models being used:

Models  $\mathcal{M}_1$  and  $\mathcal{M}_3$  were configured with identical training hyperparameters, except for the number of training epochs. Both models utilize a prediction horizon of a single timestep and a look-back to prediction ratio of  $n/m = 10$ . The network architecture consists of a single hidden layer with 100 neurons, trained using a batch duration of 60 seconds, a learning rate of 0.001, and no dropout regularization. Model  $\mathcal{M}_1$  was trained for 60 epochs, whereas model  $\mathcal{M}_3$  required an extended training schedule of 1000 epochs. This increase was motivated by the significantly shorter duration of training data available for  $\mathcal{M}_3$ , which spans only from 70 to 119 seconds due to the presence of an anomaly later in the dataset, as detailed in Table 1.

**Table 1.** Dataset usage by models  $\mathcal{M}_1$  and  $\mathcal{M}_3$  for different tasks. Time intervals are in seconds.

| Model           | Task            | Dataset(s)                                                   | Interval                            |
|-----------------|-----------------|--------------------------------------------------------------|-------------------------------------|
| $\mathcal{M}_1$ | Training        | $\mathcal{D}_1$                                              | [100, 450]                          |
|                 | Validation      | $\mathcal{D}_1$                                              | (450, 675]                          |
|                 | Error threshold | $\mathcal{D}_1$                                              | [100, 1000]                         |
|                 | Testing         | $\mathcal{D}_2, \mathcal{D}_2^{(a1, a2, a3)}, \mathcal{D}_3$ | [100, 1000], [100, 350], (135, 190] |
| $\mathcal{M}_3$ | Training        | $\mathcal{D}_3$                                              | [70, 119]                           |
|                 | Validation      | $\mathcal{D}_3$                                              | (119, 135]                          |
|                 | Error threshold | $\mathcal{D}_3$                                              | [70, 135]                           |
|                 | Testing         | $\mathcal{D}_3$                                              | (135, 190]                          |

3) How many different faulty and non faulty cases are considered in simulation and how do 1PC and MPC compare in terms of false positive and negative detection. If this has not been studied yet, please add comments about this and/or add this as future work.

A) We divided the results section to include:

1) testing under healthy dataset:

#### 4.1 Model performance during healthy conditions

The performance of the  $\mathcal{M}_1$  model, in terms of normalized error and error derivative to their respective threshold values, when tested against measured data during healthy operations,  $\mathcal{D}_2$ , are shown in Fig. 10. When using the lead principal component (i.e., IPC variation of  $\mathcal{M}_1$  model), the error values were consistent throughout the test. The MPC variation experienced a slight decline in error values as time progressed. As desired, both model variations exhibited no predicted anomalies based on any of the exceeding threshold criteria discussed.

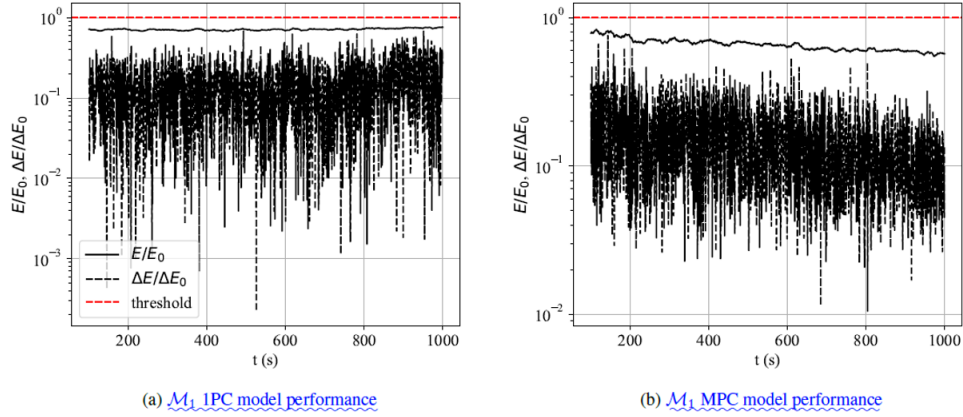

Figure 10. Error and error derivative curves between measured and  $\mathcal{M}_1$  model during healthy  $\mathcal{D}_2$  testing dataset when (a) a single or (b) multiple principal components are used.

#### 2) testing under synthetically introduced anomalies:

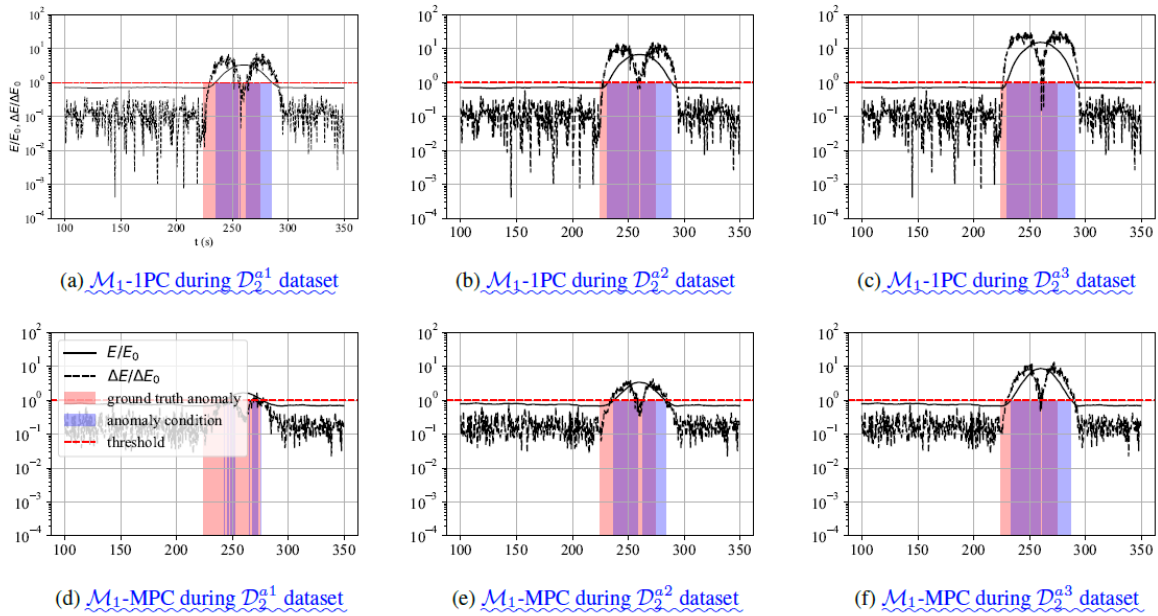

Figure 11. Anomaly detection based on  $\Delta E \wedge E$  criterion during synthetically altered dataset variations of  $\mathcal{D}_2$  and  $\mathcal{M}_1$  model detection response, with (1) IPC -  $\mathcal{D}_2^{(a1)}$ , (b) IPC -  $\mathcal{D}_2^{(a2)}$ , (c) IPC -  $\mathcal{D}_2^{(a3)}$ , (d) MPC -  $\mathcal{D}_2^{(a1)}$ , (e) MPC -  $\mathcal{D}_2^{(a2)}$ , and (f) MPC -  $\mathcal{D}_2^{(a3)}$  variations.



3) and the previous pre-strike anomaly case (actual anomaly):

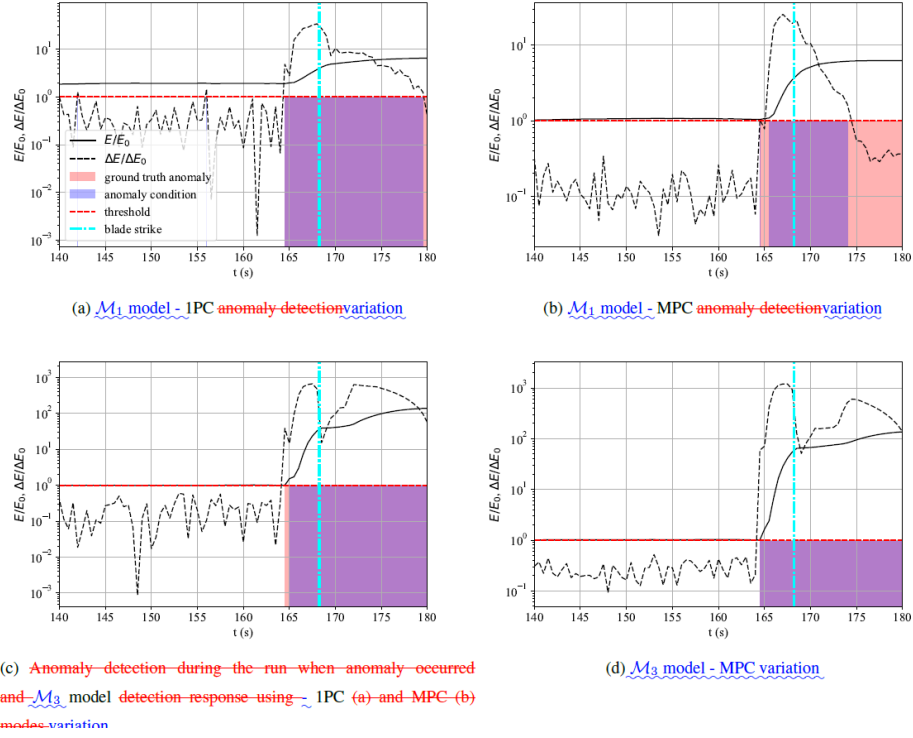

We then aggregated all these analysis in the discussion section into a single bar plot that shows all true positives, false negatives, false positives, and true negatives events for all these different cases:

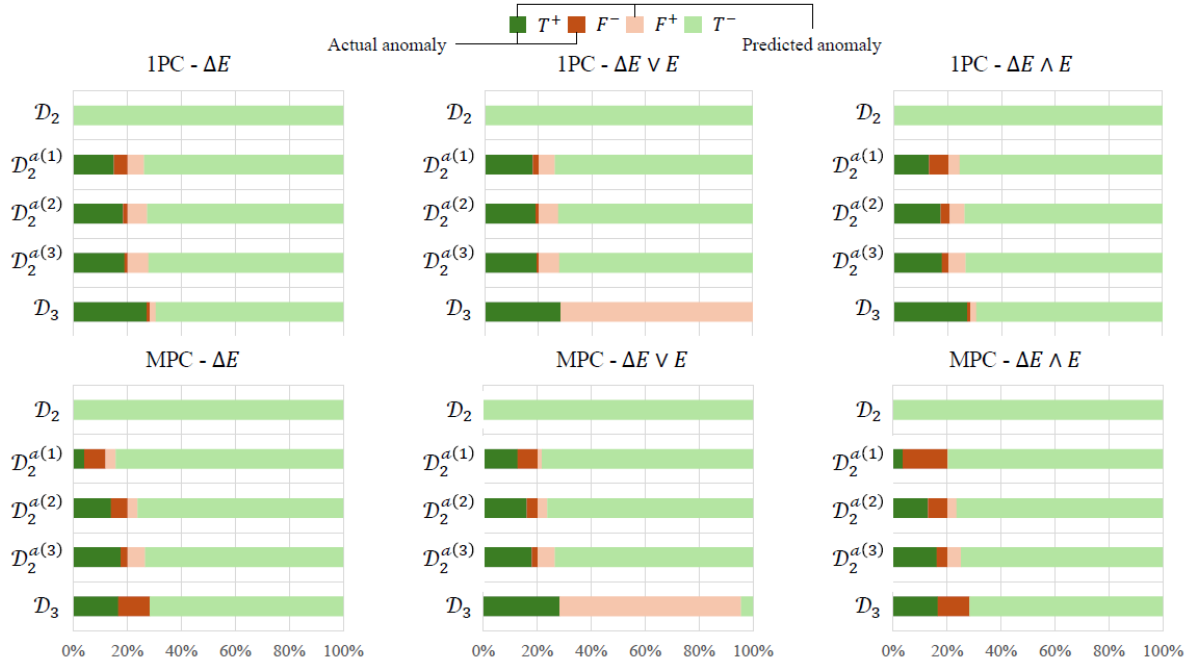

Figure 15. Percentage of true positives, false negatives, false positive, and true negatives occurrence when testing  $\mathcal{M}_1$  model for the various testing datasets.

This figure simply illustrates how the models were able to classify faulty and non-faulty conditions and how they compare to one another for various datasets tested:

280 across the same set of testing datasets. In the horizontal bar charts, darker shades correspond to the presence of anomalies in the data—hence their absence in the healthy dataset  $\mathcal{D}_2$ . The sign of each classification outcome indicates whether the model successfully detected an anomaly (positive) or failed to do so (negative). Color is used to convey prediction quality and context: green denotes correct classifications, while red indicates incorrect ones. This visual encoding effectively communicates both the correctness of model predictions and the operational context in which they occur, thereby emphasizing the model’s ability to distinguish between healthy and anomalous system states.

The error derivative appears to be the dominant criterion for accurate anomaly detection. As shown in Fig. 15, the combined threshold criterion  $\Delta E \wedge E$  results in fewer incorrect classifications (i.e., reduced red regions), whereas more flexible criteria—where either the error or its derivative must be exceeded for the anomaly to be triggered. The precision and recall as well as the  $FI$  score are presented. As the models were trained on healthy data, when being tested under other healthy data (with slight variations in blade pitch angle being tested), the HR, since it does not contain any anomalies, reports zero  $T^+$  and  $F^-$  values, but a non-zero  $F^+$  value for  $\Delta E$  and  $\Delta E/E$  combinations because some normal samples were misclassified as anomalies. The  $\Delta E \& E$  condition, however, does not trigger false anomalies and it also shows the highest  $FI$  score. The MPC model shows similar patterns but with lower  $FI$  scores: alone exceeds the threshold—lead to increased misclassifications. Notably, the reconstruction error  $E$  serves as a useful indicator for identifying deviations due to previously unseen operating conditions. In contrast, the error derivative  $\Delta E$  is particularly effective in capturing abrupt transitions between the reconstructed and measured signals, making it well-suited for detecting sudden-onset anomalies such as the one present in this paper.

This analysis is also described numerically in Table 2:

**Table 2.** Anomaly detection performance for models tested on datasets  $\mathcal{D}_2$ ,  $\mathcal{D}_2^{(a1)}$ ,  $\mathcal{D}_2^{(a2)}$ ,  $\mathcal{D}_2^{(a3)}$ , and  $\mathcal{D}_3$ , under different detection criteria:  $\Delta E$ ,  $\Delta E \vee E$ , and  $\Delta E \wedge E$ .

| Criterion           | Dataset                | IPC   |       |       |       |      |      |      | MPC   |       |       |       |      |      |      |
|---------------------|------------------------|-------|-------|-------|-------|------|------|------|-------|-------|-------|-------|------|------|------|
|                     |                        | $T^+$ | $F^-$ | $F^+$ | $T^-$ | $P$  | $R$  | $FI$ | $T^+$ | $F^-$ | $F^+$ | $T^-$ | $P$  | $R$  | $FI$ |
| $\Delta E$          | $\mathcal{D}_2$        | 0     | 0     | 0     | 1800  | N/A  | N/A  | N/A  | 0     | 0     | 0     | 1800  | N/A  | N/A  | N/A  |
|                     | $\mathcal{D}_2^{(a1)}$ | 75    | 26    | 30    | 369   | 0.74 | 0.71 | 0.73 | 18    | 36    | 17    | 382   | 0.82 | 0.18 | 0.29 |
|                     | $\mathcal{D}_2^{(a2)}$ | 92    | 9     | 36    | 363   | 0.91 | 0.72 | 0.80 | 70    | 31    | 18    | 381   | 0.80 | 0.69 | 0.74 |
|                     | $\mathcal{D}_2^{(a3)}$ | 95    | 6     | 38    | 361   | 0.94 | 0.71 | 0.81 | 88    | 13    | 32    | 367   | 0.73 | 0.87 | 0.80 |
|                     | $\mathcal{D}_3$        | 49    | 2     | 4     | 125   | 0.96 | 0.93 | 0.94 | 30    | 21    | 0     | 129   | 1.00 | 0.59 | 0.74 |
| $\Delta E \vee E$   | $\mathcal{D}_2$        | 0     | 0     | 0     | 1800  | N/A  | N/A  | N/A  | 0     | 0     | 0     | 1800  | N/A  | N/A  | N/A  |
|                     | $\mathcal{D}_2^{(a1)}$ | 90    | 11    | 30    | 369   | 0.89 | 0.75 | 0.81 | 64    | 37    | 8     | 391   | 0.89 | 0.63 | 0.74 |
|                     | $\mathcal{D}_2^{(a2)}$ | 95    | 6     | 36    | 363   | 0.94 | 0.73 | 0.82 | 81    | 20    | 18    | 381   | 0.82 | 0.80 | 0.81 |
|                     | $\mathcal{D}_2^{(a3)}$ | 97    | 4     | 38    | 361   | 0.96 | 0.72 | 0.82 | 90    | 11    | 32    | 367   | 0.74 | 0.89 | 0.81 |
|                     | $\mathcal{D}_3$        | 51    | 0     | 129   | 0     | 1.00 | 0.28 | 0.44 | 51    | 0     | 121   | 8     | 0.30 | 1.00 | 0.46 |
| $\Delta E \wedge E$ | $\mathcal{D}_2$        | 0     | 0     | 0     | 1800  | N/A  | N/A  | N/A  | 0     | 0     | 0     | 1800  | N/A  | N/A  | N/A  |
|                     | $\mathcal{D}_2^{(a1)}$ | 65    | 36    | 21    | 378   | 0.64 | 0.76 | 0.70 | 18    | 83    | 1     | 398   | 0.95 | 0.18 | 0.30 |
|                     | $\mathcal{D}_2^{(a2)}$ | 87    | 17    | 28    | 371   | 0.83 | 0.75 | 0.79 | 65    | 36    | 17    | 382   | 0.79 | 0.64 | 0.71 |
|                     | $\mathcal{D}_2^{(a3)}$ | 89    | 12    | 32    | 367   | 0.88 | 0.74 | 0.80 | 81    | 20    | 25    | 374   | 0.76 | 0.80 | 0.78 |
|                     | $\mathcal{D}_3$        | 49    | 2     | 4     | 125   | 0.96 | 0.93 | 0.94 | 30    | 21    | 0     | 129   | 1.00 | 0.59 | 0.74 |

It is very interesting to see how the two models vary in terms of recall and precision. Namely, 1PC has higher recall, and therefore, earlier anomaly detection but that can lead to over-detection. MPC, on the other hand, is more conservative approach and has less recall but has higher precision. This, however, can lead to more delay in the anomaly recall and some detection latency. Therefore, each has advantages and disadvantages. We are, therefore, shifting our language from specifically saying one model is better than the other and leaving it open to discussion. The newly introduced analysis (section 4.2 in the new manuscript) helped generalize the conclusion we reached.
